# Supplementary material
Source: PubMed Central journal article supplement (PMC10225358)
Supplement: NIHMS1897656-supplement-1.pdf [file NIHMS1897656-supplement-1.pdf]

## Supplementary Materials

**Figure S1.** Low magnification full immunohistochemistry sections of KPC mouse tumors stained for CC3 and Ki67 corresponding to the high magnification images shown in Fig.3. The scale bar corresponds to 1 mm.

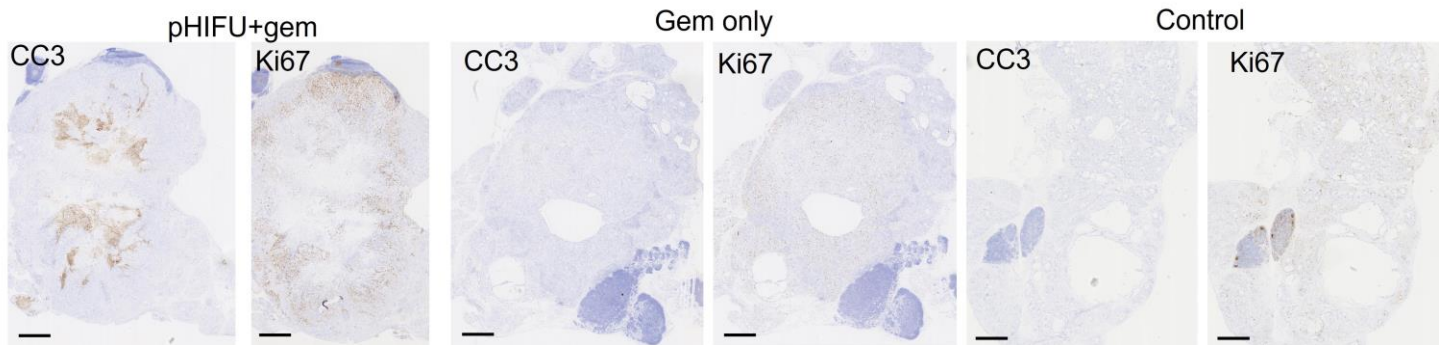

**Figure S2.** Changes in cell type scores for gem only vs control group (left) and pHIFU+gem vs gem only group (right), derived from gene expression analysis. Per nSolver quality control p-values indicating the validity of each cell type's measurement (i.e. genes previously shown to be characteristic of cell population) only abundance of T cells and B cells could be reliably measured ( $\dagger p < 0.01$ ;  $\ddagger p < 0.001$ ). Trends in abundance of cytotoxic cells ( $p = 0.11$  left,  $p = 0.1$  right) and macrophages ( $p = 0.1$  left,  $p = 0.26$  right) should be considered with caution.

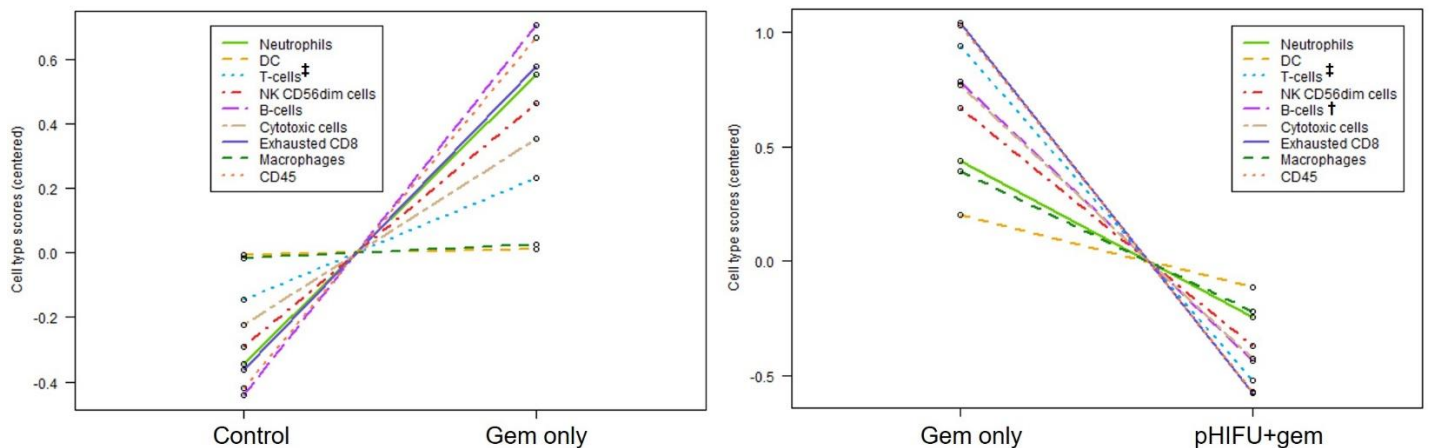

**Figure S3.** Tumor growth curves corresponding to Fig.2 expressed in absolute volume.

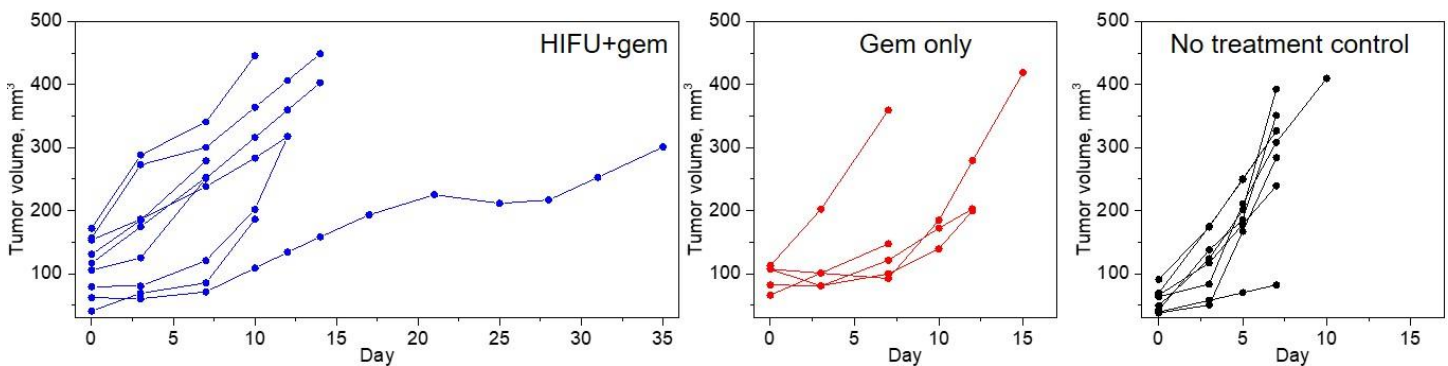

**Table S1.** 1. Statistically significant differential gene expression in gem treatment group vs no treatment control

| <b>Gene name</b> | <b>Log2 fold change</b> | <b>Standard error</b> | <b>P-value</b> |
|------------------|-------------------------|-----------------------|----------------|
| Csf2             | 3.16                    | 0.584                 | 0.000214       |
| Relb             | 0.548                   | 0.113                 | 0.000504       |
| Pparg            | 2.39                    | 0.544                 | 0.00134        |
| Plau             | 1.14                    | 0.294                 | 0.00252        |
| Traf2            | 0.408                   | 0.111                 | 0.00371        |
| Cxcl5            | 2.47                    | 0.724                 | 0.0058         |
| Il34             | 0.892                   | 0.267                 | 0.00653        |
| Csf1             | 0.806                   | 0.249                 | 0.00786        |
| Clec4n           | 1.05                    | 0.327                 | 0.00855        |
| Klra2            | 1.14                    | 0.372                 | 0.011          |
| Creb1            | 0.841                   | 0.276                 | 0.0112         |
| Cd47             | -0.499                  | 0.165                 | 0.0116         |
| Gtf3c1           | 0.532                   | 0.176                 | 0.0116         |
| Ccr1             | 1.05                    | 0.352                 | 0.0123         |
| Smad3            | 0.673                   | 0.23                  | 0.0136         |
| Ddx58            | 0.815                   | 0.279                 | 0.0138         |
| Dmbt1            | -1.95                   | 0.705                 | 0.0182         |
| Dusp4            | 0.597                   | 0.22                  | 0.0202         |
| Nfkb1            | 0.647                   | 0.246                 | 0.0234         |
| Cxcl1            | 2.09                    | 0.814                 | 0.028          |
| Trp53            | 0.999                   | 0.398                 | 0.0289         |
| Il18r1           | 0.8                     | 0.319                 | 0.0292         |
| Prkcd            | 0.898                   | 0.362                 | 0.0307         |
| Txnip            | -1.46                   | 0.595                 | 0.0318         |
| Il1rn            | 0.866                   | 0.354                 | 0.0324         |
| Mcam             | 0.451                   | 0.186                 | 0.0342         |
| Rps6             | -0.872                  | 0.362                 | 0.0347         |
| Syk              | 0.642                   | 0.268                 | 0.0355         |
| Ncf4             | 1.04                    | 0.433                 | 0.0357         |
| Cd19             | 2.25                    | 0.929                 | 0.0357         |
| Casp8            | 0.579                   | 0.247                 | 0.0393         |
| Nfkb2            | 0.63                    | 0.269                 | 0.0393         |
| Lif              | 0.894                   | 0.387                 | 0.0415         |
| Runx1            | 0.556                   | 0.246                 | 0.0452         |
| Ambp             | -2                      | 0.889                 | 0.046          |
| Smpd3            | -1.11                   | 0.497                 | 0.047          |
| Fcgr1            | 0.979                   | 0.438                 | 0.0473         |
| Kdr              | 0.683                   | 0.306                 | 0.0478         |
| Csf2rb           | 1.12                    | 0.508                 | 0.0498         |

2. Statistically significant differential gene expression in pHIFU+gem treatment group vs gem alone

| Gene name | Log2 fold change | Standard error | P-value  |
|-----------|------------------|----------------|----------|
| Irf1      | -1.18            | 0.205          | 8.73E-05 |
| Bcl2      | -1.39            | 0.248          | 0.000112 |
| Il34      | -1.03            | 0.196          | 0.0002   |
| Tapbp     | -0.759           | 0.157          | 0.000417 |
| Atg16l1   | -0.612           | 0.129          | 0.000467 |
| Ly86      | -1.31            | 0.288          | 0.000695 |
| Itch      | -0.967           | 0.225          | 0.00103  |
| Tfeb      | -1.16            | 0.271          | 0.00105  |
| Cfh       | -1.36            | 0.323          | 0.00122  |
| Ifih1     | -1.36            | 0.331          | 0.00145  |
| Cmklr1    | -1.04            | 0.256          | 0.00161  |
| Stat1     | -1.45            | 0.363          | 0.00181  |
| Il6st     | -1.16            | 0.292          | 0.00185  |
| Ddx58     | -1.19            | 0.304          | 0.00211  |
| Csf2rb    | -1.49            | 0.384          | 0.00215  |
| Tap1      | -1.84            | 0.475          | 0.00218  |
| H2-K1     | -1.31            | 0.338          | 0.00219  |
| Fcgr1     | -1.21            | 0.313          | 0.00222  |
| H2-M3     | -2.11            | 0.557          | 0.00258  |
| Msln      | 1.36             | 0.36           | 0.00261  |
| Rel       | -1.04            | 0.28           | 0.00297  |
| Fap       | -1.59            | 0.433          | 0.00312  |
| Syk       | -0.776           | 0.211          | 0.00313  |
| H2        | -1.48            | 0.401          | 0.00314  |
| Lyn       | -1.01            | 0.281          | 0.00373  |
| Csf1      | -0.756           | 0.211          | 0.00379  |
| Ccr5      | -1.49            | 0.417          | 0.00391  |
| Cxcl9     | -2.3             | 0.636          | 0.00403  |
| Casp8     | -0.692           | 0.197          | 0.00425  |
| Icosl     | -1.45            | 0.413          | 0.00428  |
| Fcer1g    | -0.954           | 0.274          | 0.00447  |
| Dock9     | -0.931           | 0.269          | 0.00467  |
| Tank      | -0.978           | 0.283          | 0.00474  |
| H2-D1     | -1.16            | 0.335          | 0.00482  |
| Cd97      | -0.541           | 0.157          | 0.00485  |
| Ccl17     | -1.1             | 0.32           | 0.0051   |
| Tgfbr2    | -2.2             | 0.648          | 0.00535  |
| Amica1    | -1.08            | 0.319          | 0.00554  |
| H2-Eb1    | -1.32            | 0.392          | 0.00575  |
| Cd55      | -1.58            | 0.473          | 0.00594  |
| Irf3      | -1.22            | 0.367          | 0.00599  |
| Abca1     | -0.684           | 0.206          | 0.00609  |

|          |        |       |         |
|----------|--------|-------|---------|
| Psmb10   | -0.902 | 0.272 | 0.00615 |
| H2       | -0.836 | 0.254 | 0.00642 |
| Prkcd    | -1.61  | 0.496 | 0.00693 |
| Cd84     | -0.943 | 0.291 | 0.00704 |
| Crebbp   | -1.09  | 0.339 | 0.00731 |
| Ccr2     | -0.597 | 0.186 | 0.00743 |
| Tlr8     | -1.62  | 0.504 | 0.00749 |
| Kdr      | -1.32  | 0.413 | 0.00756 |
| Klra2    | -1.04  | 0.326 | 0.00756 |
| Tnfrsf1b | -1.23  | 0.388 | 0.00798 |
| Cd1d1    | -0.746 | 0.237 | 0.00831 |
| Mertk    | -1.08  | 0.345 | 0.00892 |
| Ptprc    | -1.25  | 0.401 | 0.00908 |
| Map3k1   | -1.5   | 0.483 | 0.00912 |
| Mapk14   | -0.682 | 0.22  | 0.00921 |
| Ikbke    | -0.623 | 0.201 | 0.00924 |
| Isg20    | -1.57  | 0.508 | 0.00928 |
| Stat6    | 0.579  | 0.187 | 0.00933 |
| Csf1r    | -0.387 | 0.125 | 0.00942 |
| Itgal    | -1.31  | 0.428 | 0.01    |
| Igf1r    | -1.24  | 0.406 | 0.0102  |
| Smpd3    | -0.941 | 0.31  | 0.0102  |
| C1qa     | 0.997  | 0.329 | 0.0104  |
| Ep300    | -0.605 | 0.2   | 0.0105  |
| Entpd1   | -1.01  | 0.334 | 0.0108  |
| H2-T23   | -1.01  | 0.336 | 0.0109  |
| Fn1      | -0.899 | 0.299 | 0.0109  |
| Nlrp3    | -0.839 | 0.28  | 0.0111  |
| Pparg    | -1.39  | 0.467 | 0.0116  |
| Psmb9    | 1.13   | 0.381 | 0.0117  |
| Il6ra    | -1.37  | 0.462 | 0.0119  |
| Vegfc    | -0.968 | 0.327 | 0.0119  |
| Irf8     | -0.657 | 0.222 | 0.0121  |
| Atm      | -0.943 | 0.322 | 0.0127  |
| Nfatc4   | -0.568 | 0.195 | 0.0128  |
| Abcg1    | -1.26  | 0.432 | 0.0131  |
| Tgfb3    | -0.966 | 0.332 | 0.0131  |
| Tgfb1    | -0.859 | 0.3   | 0.0143  |
| Il7r     | -0.598 | 0.211 | 0.0152  |
| Ppbp     | -1.54  | 0.548 | 0.0157  |
| C1qbp    | 2.74   | 0.978 | 0.0159  |
| Cd9      | 0.434  | 0.156 | 0.0167  |
| H2-Aa    | 0.768  | 0.279 | 0.0175  |
| Csf3r    | -1.38  | 0.501 | 0.0176  |
| Tyk2     | -1.4   | 0.509 | 0.0177  |
| Ccl5     | -1.36  | 0.497 | 0.018   |

|          |        |       |        |
|----------|--------|-------|--------|
| Tfrc     | -1.82  | 0.656 | 0.0181 |
| Ifnar1   | 1.1    | 0.403 | 0.0182 |
| Smad3    | -0.627 | 0.23  | 0.0186 |
| Il1b     | -0.706 | 0.262 | 0.0195 |
| Irak4    | -1.22  | 0.456 | 0.0199 |
| Bst2     | -0.671 | 0.25  | 0.02   |
| Chuk     | -0.747 | 0.279 | 0.0201 |
| Ctss     | -1.03  | 0.384 | 0.0202 |
| Notch1   | -0.698 | 0.261 | 0.0203 |
| Fyn      | -0.63  | 0.236 | 0.0203 |
| Cd19     | -1.02  | 0.383 | 0.0206 |
| Ifi27    | -2.33  | 0.866 | 0.0211 |
| Csf2     | -1.15  | 0.437 | 0.0216 |
| H2-Dma   | -1.92  | 0.727 | 0.0218 |
| Lif      | -1.08  | 0.409 | 0.0218 |
| Nfatc1   | -1.02  | 0.388 | 0.0218 |
| C3ar1    | -0.98  | 0.374 | 0.0222 |
| Gpi1     | -1.28  | 0.487 | 0.0223 |
| Fcgr2b   | 0.418  | 0.159 | 0.0224 |
| Jak3     | -0.887 | 0.339 | 0.0226 |
| Cd74     | -1.29  | 0.494 | 0.0231 |
| Irf2     | -1.27  | 0.488 | 0.0231 |
| Lcp1     | -0.51  | 0.196 | 0.0232 |
| Tnfrsf1a | -0.758 | 0.292 | 0.0234 |
| Stat3    | -0.473 | 0.182 | 0.0234 |
| Cd274    | -0.482 | 0.186 | 0.0236 |
| Marco    | -0.984 | 0.382 | 0.0243 |
| Irf5     | -2.5   | 0.97  | 0.0244 |
| Ltb      | -0.84  | 0.328 | 0.0251 |
| Runx1    | -1.36  | 0.534 | 0.0259 |
| Nod1     | -0.594 | 0.235 | 0.0262 |
| C1qb     | -1.09  | 0.435 | 0.0274 |
| Mrc1     | -0.626 | 0.249 | 0.0274 |
| Ncf4     | -0.847 | 0.34  | 0.0282 |
| Traf6    | -0.868 | 0.349 | 0.0287 |
| Ikzf1    | -0.299 | 0.12  | 0.0289 |
| Cd200    | -1.56  | 0.627 | 0.03   |
| H2-DMb2  | -0.697 | 0.284 | 0.0304 |
| Jak1     | -1.62  | 0.66  | 0.0306 |
| Ifitm1   | -0.461 | 0.189 | 0.0309 |
| Axl      | -1.55  | 0.636 | 0.0313 |
| Irak2    | -0.771 | 0.318 | 0.0319 |
| Lcn2     | -0.888 | 0.367 | 0.0325 |
| Il1r1    | -1.28  | 0.53  | 0.0327 |
| Clec5a   | -0.705 | 0.294 | 0.0334 |
| Itga4    | -0.952 | 0.397 | 0.0338 |

|         |        |        |        |
|---------|--------|--------|--------|
| Itgb2   | -0.944 | 0.394  | 0.034  |
| Clec4n  | -0.881 | 0.369  | 0.0343 |
| Cd86    | -0.875 | 0.367  | 0.0343 |
| Psmb8   | -0.948 | 0.397  | 0.0344 |
| Rela    | -1.06  | 0.451  | 0.0373 |
| Akt3    | -0.393 | 0.168  | 0.0373 |
| App     | -0.184 | 0.079  | 0.0379 |
| Arg1    | -0.226 | 0.0971 | 0.0386 |
| Mcam    | 0.853  | 0.369  | 0.0391 |
| Cd34    | -0.5   | 0.216  | 0.0392 |
| Tie1    | -0.622 | 0.269  | 0.0393 |
| Map2k4  | -0.62  | 0.268  | 0.0393 |
| Egfr    | -0.418 | 0.181  | 0.0393 |
| Cx3cr1  | -0.7   | 0.303  | 0.0395 |
| Ewsr1   | -0.883 | 0.384  | 0.0404 |
| Il18rap | -0.472 | 0.206  | 0.0409 |
| Tgfbr1  | -0.524 | 0.229  | 0.0413 |
| Yy1     | -0.506 | 0.222  | 0.0416 |
| Selplg  | 0.268  | 0.117  | 0.0416 |
| Ifitm2  | -0.742 | 0.326  | 0.0421 |
| Reps1   | -0.466 | 0.209  | 0.046  |
| Cxcr4   | -0.437 | 0.197  | 0.0469 |
| Psmb7   | -0.552 | 0.251  | 0.0486 |
| Ccl19   | 0.294  | 0.134  | 0.0488 |
| Ets1    | -1.55  | 0.706  | 0.049  |
| Ifi35   | -0.657 | 0.3    | 0.0491 |
| Ifi35   | -0.42  | 0.192  | 0.0498 |

### 3. Statistically significant differential gene expression in pHIFU+gem treatment group vs gem alone

| Gene name | Log2 fold change | Standard error | P-value  |
|-----------|------------------|----------------|----------|
| Tapbp     | -0.702           | 0.141          | 0.000165 |
| Cxcl5     | 2.58             | 0.544          | 0.000261 |
| H2-K1     | -1.45            | 0.371          | 0.00136  |
| S100a8    | 2.22             | 0.596          | 0.00202  |
| Ifih1     | -1.16            | 0.323          | 0.0027   |
| H2-D1     | -1.06            | 0.299          | 0.00296  |
| Il1a      | 2.03             | 0.59           | 0.00371  |
| Stat3     | -0.456           | 0.134          | 0.00386  |
| Tap1      | -1.87            | 0.563          | 0.00455  |
| Txnip     | -1.51            | 0.453          | 0.00462  |
| Il6ra     | -1.42            | 0.435          | 0.00518  |
| Il13ra1   | -0.426           | 0.134          | 0.00624  |
| H2-T23    | -1.14            | 0.36           | 0.00634  |
| Dpp4      | -2.07            | 0.676          | 0.00834  |

|           |        |       |         |
|-----------|--------|-------|---------|
| Ifit3     | -1.78  | 0.587 | 0.00912 |
| Amica1    | -1.29  | 0.432 | 0.0092  |
| Stat5b    | -0.619 | 0.209 | 0.00979 |
| Jak1      | -0.408 | 0.141 | 0.0112  |
| Psmb10    | -0.876 | 0.304 | 0.0114  |
| H2        | -1.15  | 0.408 | 0.0129  |
| Cfh       | -0.958 | 0.34  | 0.0131  |
| Il7r      | -1.99  | 0.702 | 0.0132  |
| Bid       | 1.21   | 0.433 | 0.0134  |
| Fyn       | -0.959 | 0.346 | 0.0144  |
| Zbp1      | -1.69  | 0.613 | 0.0147  |
| Abca1     | -0.691 | 0.252 | 0.015   |
| Msln      | 1.25   | 0.461 | 0.016   |
| Dmbt1     | -1.78  | 0.656 | 0.0162  |
| Yy1       | 0.394  | 0.146 | 0.0164  |
| Il2rb     | -1.8   | 0.665 | 0.0172  |
| Irf1      | -0.92  | 0.346 | 0.018   |
| H2-Eb1    | -1.33  | 0.509 | 0.0194  |
| Psmb9     | -1.4   | 0.539 | 0.0202  |
| Tollip    | -0.319 | 0.125 | 0.022   |
| Lrp1      | -0.605 | 0.237 | 0.0222  |
| Map2k4    | -0.374 | 0.148 | 0.0235  |
| Mrc1      | -0.869 | 0.348 | 0.0247  |
| Stat1     | -1.21  | 0.486 | 0.0248  |
| Psmb8     | -1.33  | 0.536 | 0.0254  |
| H2-Ab1    | -1.32  | 0.539 | 0.0269  |
| H2-Q2     | -2.24  | 0.908 | 0.027   |
| Il6st     | -0.803 | 0.328 | 0.0271  |
| Ccl5      | -1.42  | 0.579 | 0.0275  |
| Rps6      | -0.607 | 0.249 | 0.0278  |
| Nlrc5     | -1.44  | 0.605 | 0.0318  |
| Fas       | -1.06  | 0.449 | 0.0318  |
| Apoe      | -1.11  | 0.469 | 0.0319  |
| Tnfrsf10b | 0.394  | 0.167 | 0.0319  |
| Myc       | 0.593  | 0.251 | 0.0319  |
| Tnfrsf1b  | -0.693 | 0.295 | 0.0328  |
| Tap2      | -2.04  | 0.876 | 0.0354  |
| Icosl     | -1.05  | 0.46  | 0.0377  |
| Btla      | -1.92  | 0.838 | 0.0381  |
| Cxcl1     | 1.49   | 0.655 | 0.0394  |
| Cd74      | -1.14  | 0.509 | 0.04    |
| Col3a1    | -0.679 | 0.302 | 0.04    |
| Entpd1    | -0.57  | 0.255 | 0.0409  |
| C3ar1     | -0.978 | 0.438 | 0.0413  |
| Itch      | -0.506 | 0.228 | 0.0421  |
| Xbp1      | -0.47  | 0.214 | 0.044   |
| Tlr8      | -0.772 | 0.351 | 0.0441  |
| Tgfbr2    | -0.858 | 0.392 | 0.0447  |

|        |        |       |        |
|--------|--------|-------|--------|
| Fcer1g | -0.681 | 0.313 | 0.0457 |
| Dusp4  | 0.507  | 0.233 | 0.0462 |
| Ppbp   | 1.96   | 0.904 | 0.0466 |
| Inpp5d | -1.25  | 0.576 | 0.0471 |
| H2-Aa  | -1.08  | 0.499 | 0.0475 |
| Abcg1  | -1.08  | 0.504 | 0.0483 |
| C4b    | -1.01  | 0.471 | 0.0494 |
| Itga2  | 0.432  | 0.203 | 0.0498 |
